# Supplementary material
Source: PubMed Central journal article supplement (PMC4629500)
Supplement: NIHMS729790-supplement-Supplemental_Figures.pdf [file NIHMS729790-supplement-Supplemental_Figures.pdf]

## Supplemental Figures

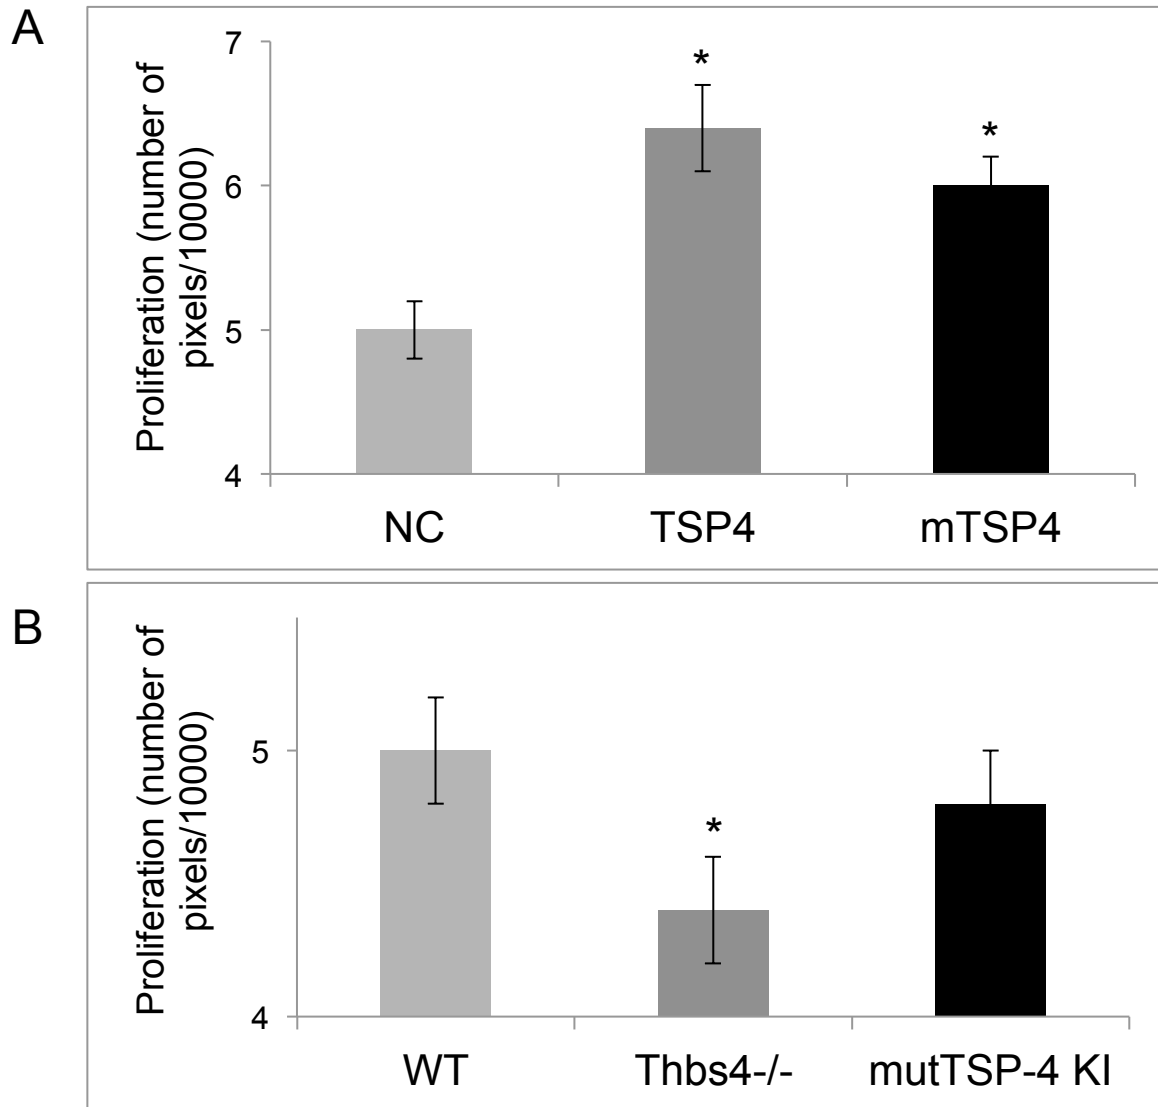

**Supplemental Figure I:** A: MLEC were added to 24-well plates and incubated at 37 °C for 48 h. Unattached cells were removed by washing, and the remaining cells were fixed with 4% paraformaldehyde, stained with Trypan Blue, and counted using Adobe Photoshop software. A: MLEC from WT mice were added to the plates coated with fibronectin (control) or fibronectin mixed with rTSP4 or mTSP4. B: EC isolated from WT, *Thbs4*<sup>-/-</sup>, and mutTSP4 KI mice were plated onto fibronectin-coated plates. \* $p < 0.05$  compared to WT,  $n = 3$ .

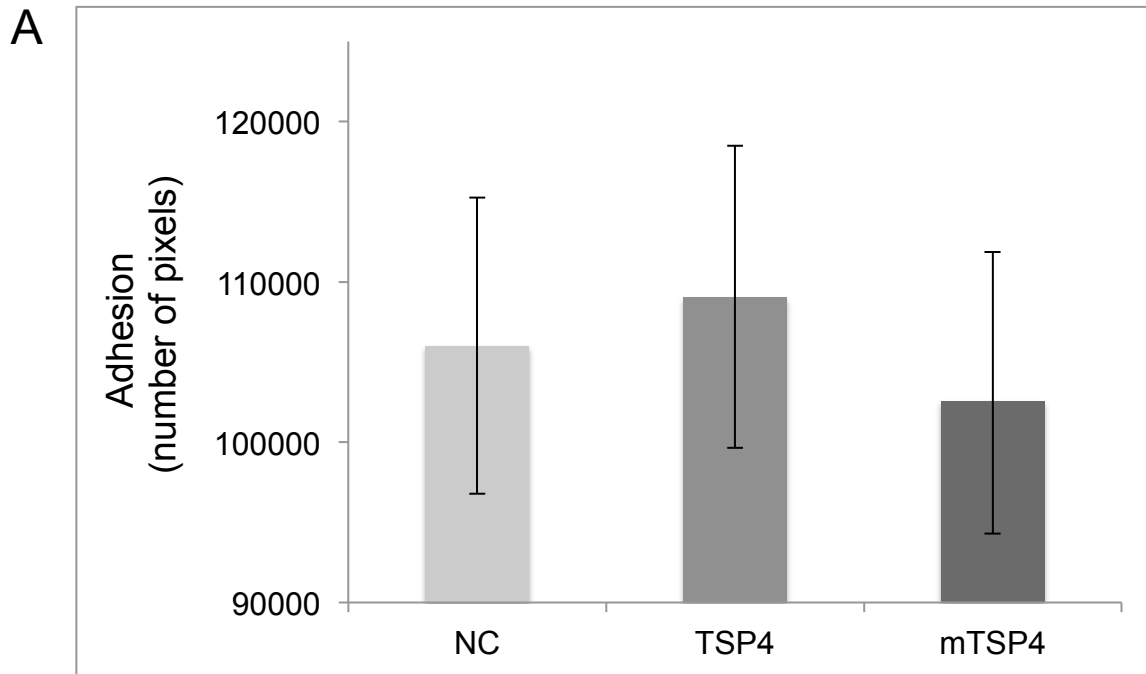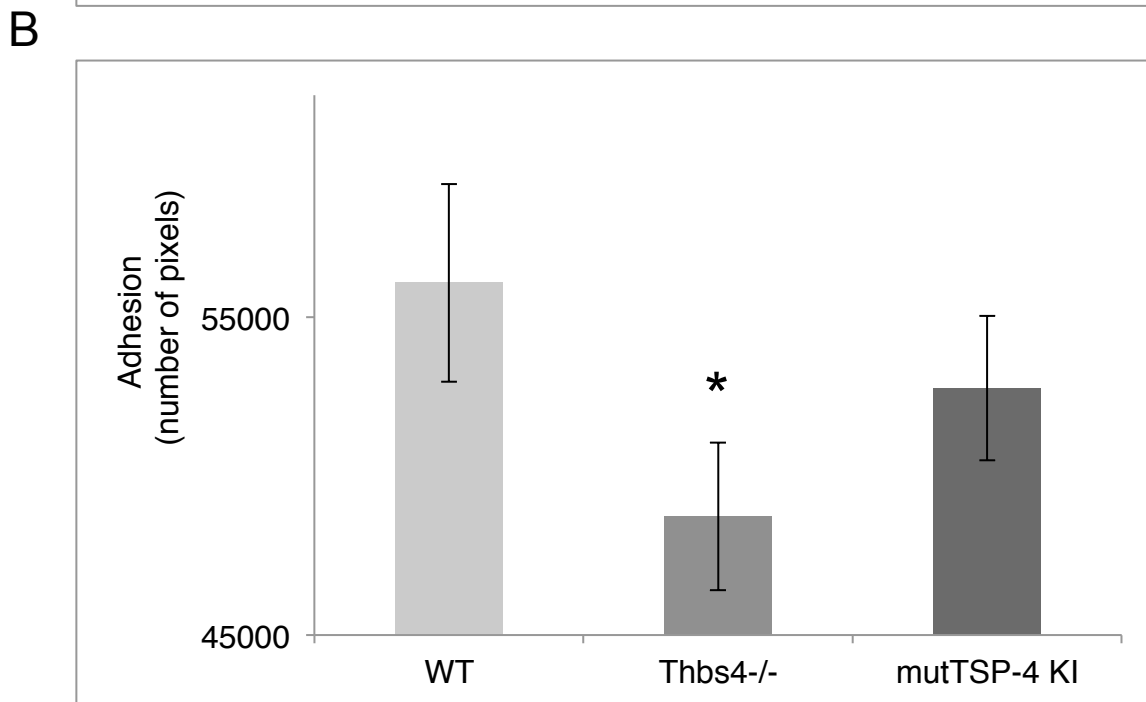

**Supplemental Figure II:** MLEC were added into 24-well plates and incubated at 37 °C for 1 h. Unattached cells were removed by washing, and the remaining cells were fixed with 4% paraformaldehyde, stained with Trypan Blue, and counted using Adobe Photoshop software. A: MLEC from WT mice were seeded into the plates coated with fibronectin (control) or fibronectin mixed with rTSP4 or mTSP4. B: EC isolated from WT, *Thbs4*<sup>-/-</sup>, and mutTSP-4 KI mice were used. \*p<0.05 compared to WT cells, n=3.
